# Supplementary material for: Lead-free 2D MASnBr3 and Ruddlesden–Popper BA2MASn2Br7 as light harvesting materials
Source: Royal Society of Chemistry journal article supplement (doi:10.1039/d3ra00108c), 2023-01-01
Supplement: d3ra00108c1.pdf [file d3ra00108c1.pdf]

# Supplementary Information

## Lead-Free 2D MASnBr<sub>3</sub> and Ruddlesden-Popper BA<sub>2</sub>MASn<sub>2</sub>Br<sub>7</sub> as Light Harvest Materials

Sandip R. Kumavat<sup>a</sup>, Yogesh Sonvane<sup>a\*</sup>

*Advanced Materials Lab, Department of Physics, Sardar Vallabhbhai National Institute of  
Technology, Surat 395007, India*

### Solar Cell Efficiency Parameter

Moreover, we have investigated that 2D MASnBr<sub>3</sub> perovskite materials have strong optical absorption which is useful to improve solar cell efficiency. To find the performance of the 2D MASnBr<sub>3</sub> layer structure in the solar cell device. To better understand the performance of the solar cell, we have calculated open-circuit voltage (Voc), fill factor (FF), power conversion efficiency ( $\eta$ ), short circuit current density (Jsc). As we know, Shockley and Quessier (SQ) model depend on the band gap ( $E_g$ ) of material to calculate the performance of solar cell efficiency which gives  $A(E) = 1$  if  $E > E_g$  and  $A(E) = 0$  for  $E < E_g$  [5,41]. With all this calculation of solar cells, parameters are good agreement with the previously reported in experimental as well as theoretical results [5,41,43].

**Table S1:** Represents calculated solar cell parameters for tensile strain open circuit voltage, Fill Factor, short circuit current density, power conversion efficiency of of MASnBr<sub>3</sub> monolayer.

| MASnBr <sub>3</sub>                   | 0 %    | 2 %    | 4 %    | 6 %    | 8 %    | 10%    |
|---------------------------------------|--------|--------|--------|--------|--------|--------|
| V <sub>oc</sub> (eV)                  | 2.64   | 2.64   | 2.68   | 2.70   | 2.71   | 2.75   |
| FF                                    | 0.9453 | 0.9453 | 0.9459 | 0.9462 | 0.9465 | 0.9471 |
| J <sub>sc</sub> (mA/cm <sup>2</sup> ) | 9.40   | 9.03   | 8.35   | 7.31   | 6.94   | 5.56   |
| η(%)                                  | 23.46  | 22.54  | 21.43  | 18.64  | 17.83  | 14.83  |

**Table S2:** Represents calculated solar cell parameters for compressive strain open circuit voltage, Fill Factor, short circuit current density, power conversion efficiency of of MASnBr<sub>3</sub> monolayer.

| MASnBr <sub>3</sub>                   | 0 %    | 2 %    | 4 %    | 6 %    | 8 %    | 10%    |
|---------------------------------------|--------|--------|--------|--------|--------|--------|
| V <sub>oc</sub> (eV)                  | 2.64   | 2.64   | 2.66   | 2.68   | 2.71   | 2.75   |
| FF                                    | 0.9453 | 0.9453 | 0.9456 | 0.9459 | 0.9465 | 0.9471 |
| J <sub>sc</sub> (mA/cm <sup>2</sup> ) | 9.40   | 8.64   | 8.25   | 7.31   | 6.22   | 5.07   |
| η(%)                                  | 23.46  | 21.56  | 21.74  | 18.51  | 15.98  | 13.21  |

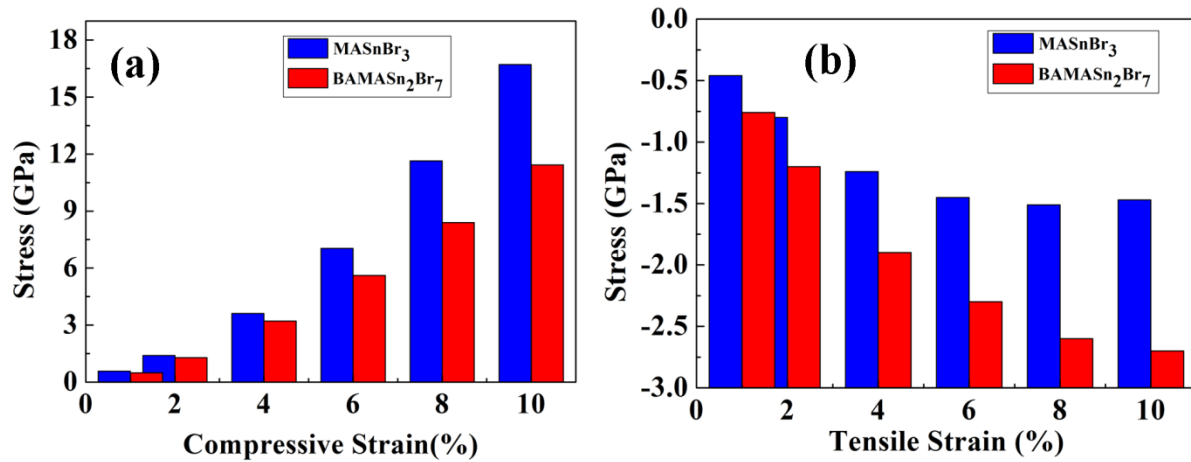

**Fig. S1.** Applied (a) Compressive and (b) Tensile strain varies Stress of MASnBr<sub>3</sub> and BAMASn<sub>2</sub>Br<sub>7</sub>.
